# Supplementary material for: The prediction of protein-protein interaction networks in rice blast fungus
Source: PubMed Central journal article supplement (PMC2601049; doi:10.1186/1471-2164-9-519), 2008-11-02

**Additional file 3. Clusters or communities containing pathogenicity genes (proteins).**

Those nodes represented by red triangles are pathogenicity genes. The description alongside each cluster is the enriched GO terms identified by Fisher exact test followed by FDR correction. The corresponding corrected  $p$ -value is also listed. This figure can be zoomed in to view the corresponding BROAD accession number of each node.

Protein transport  
 $1.47 \times 10^{-2}$

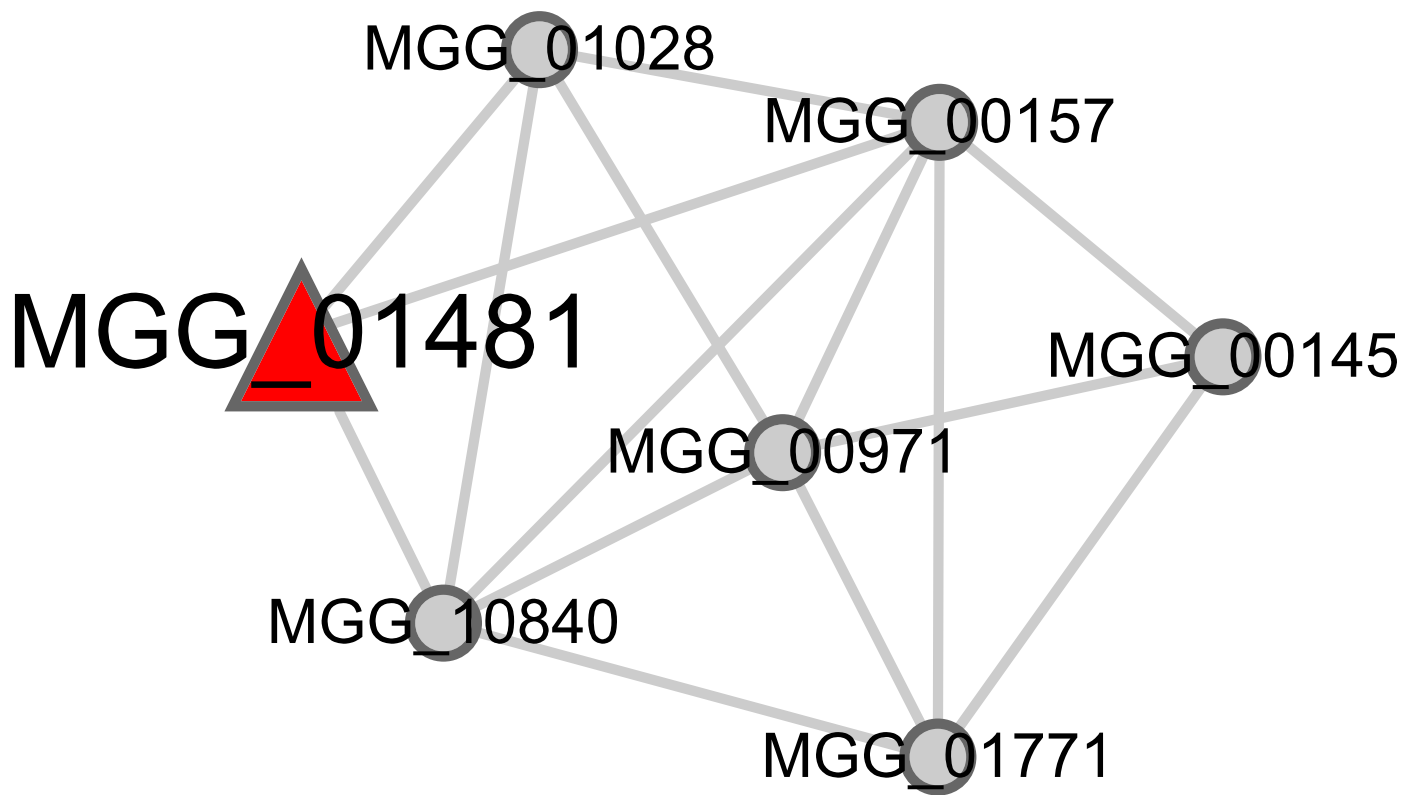

Phosphorus metabolic process  
 $2.58 \times 10^{-7}$

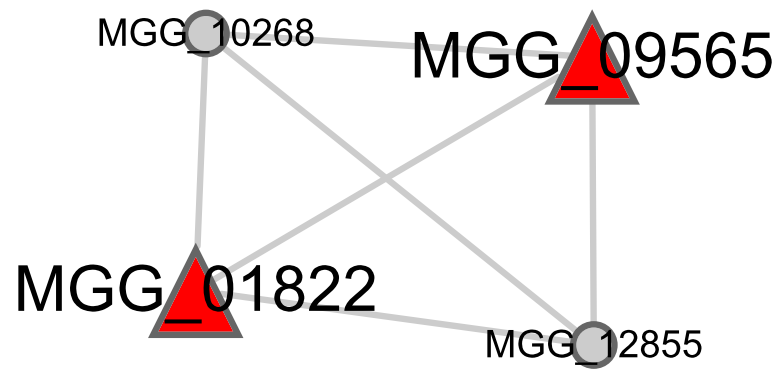

Neurological system process  
 $1.98 \times 10^{-3}$

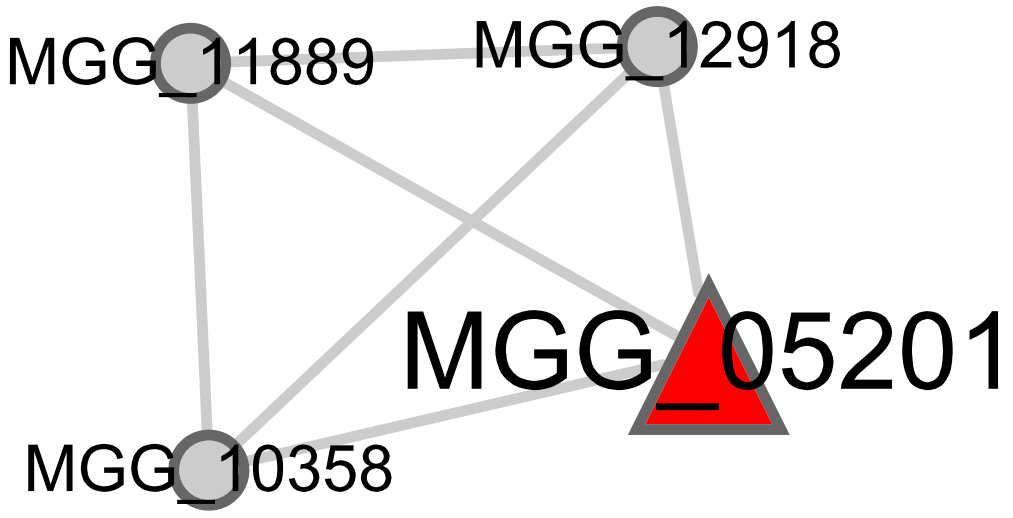

Ion transport  
 $7.83 \times 10^{-4}$

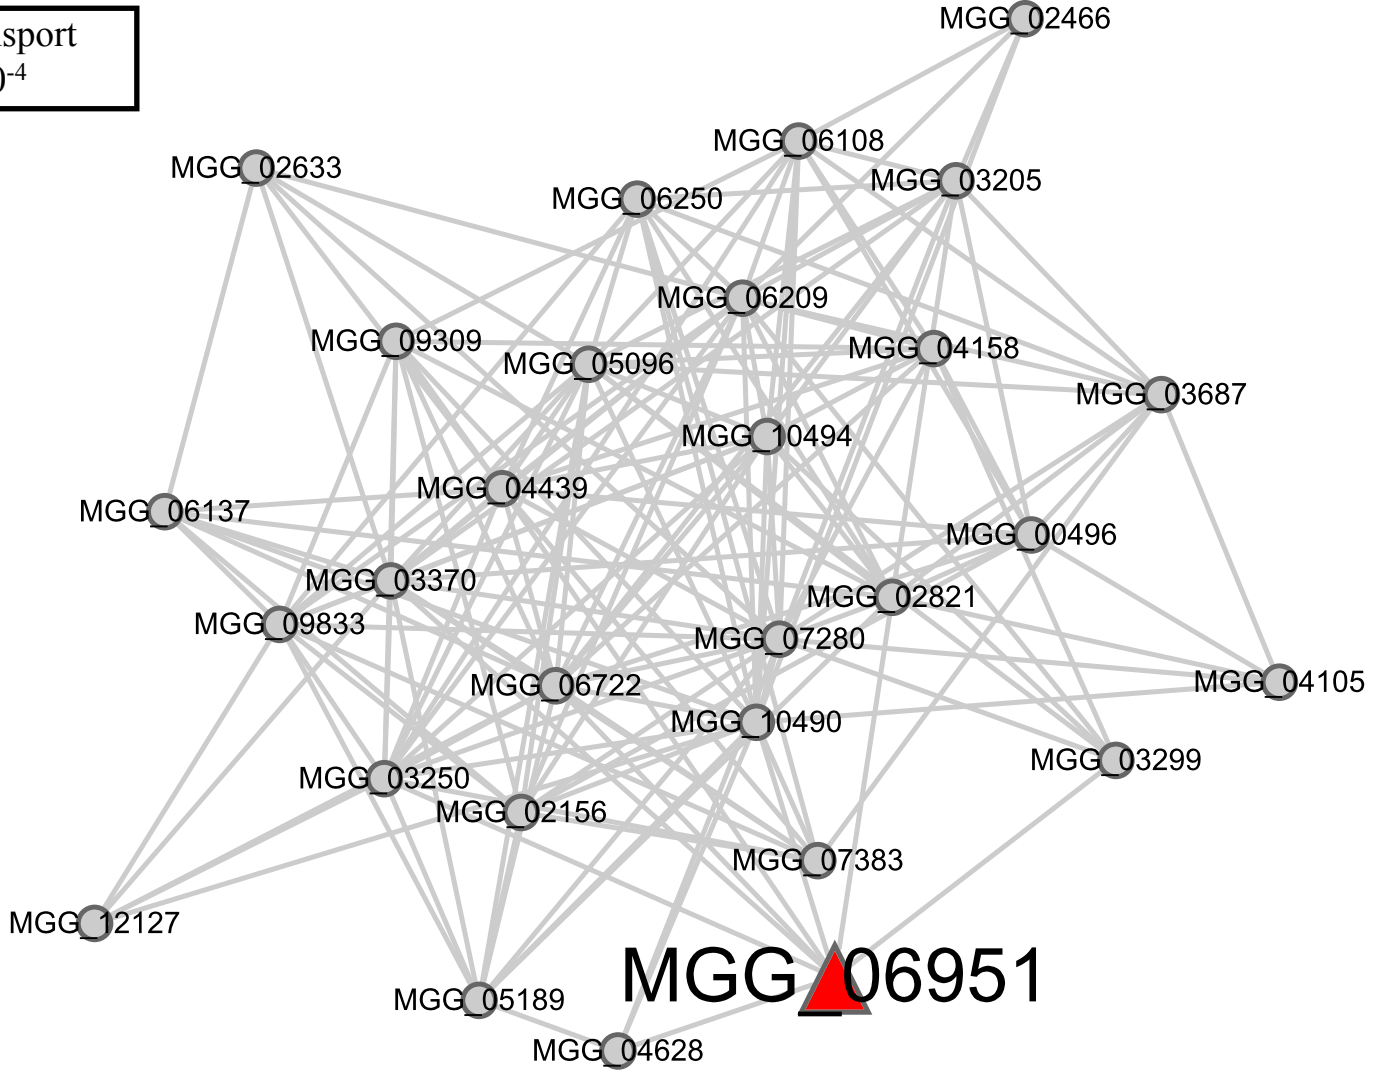

RNA processing  
 $3.15 \times 10^{-29}$

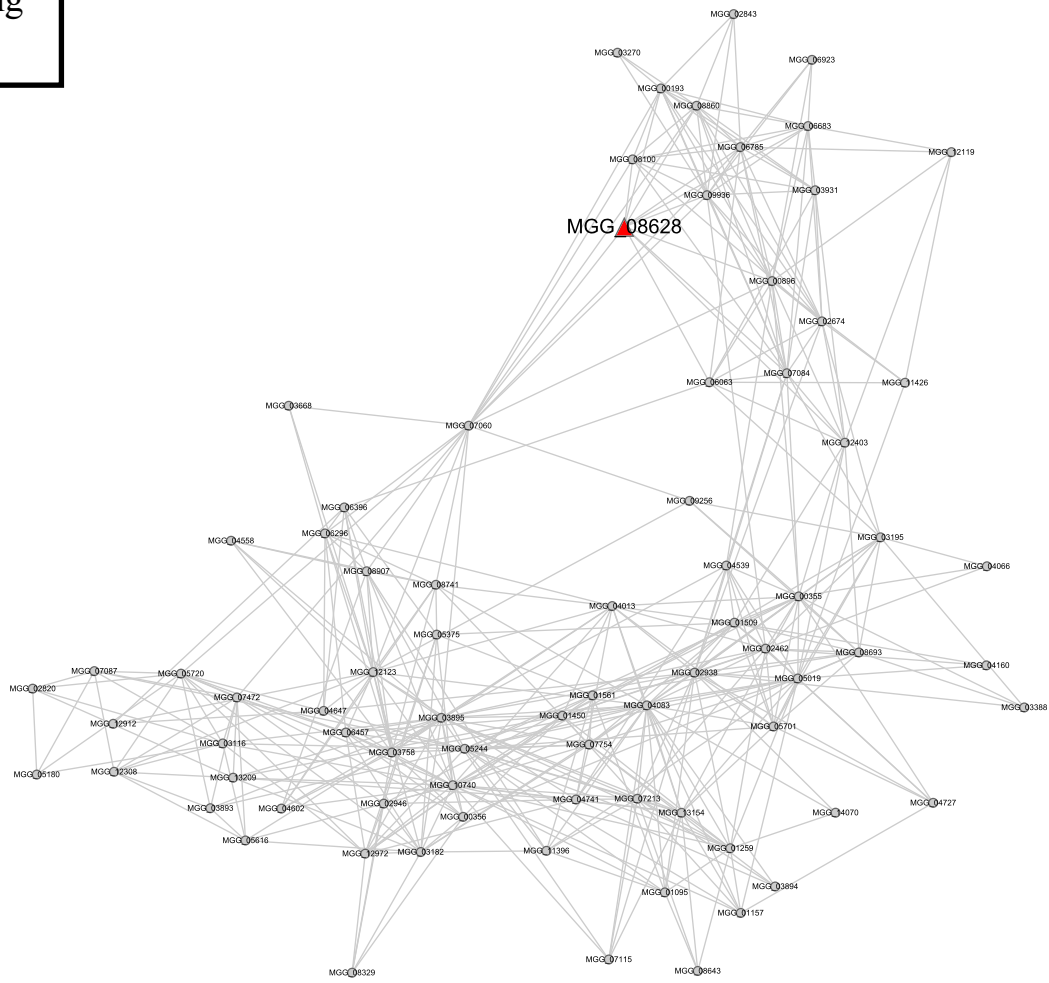

Symbiosis, encompassing mutualism through parasitism  
 $1.75 \times 10^{-2}$

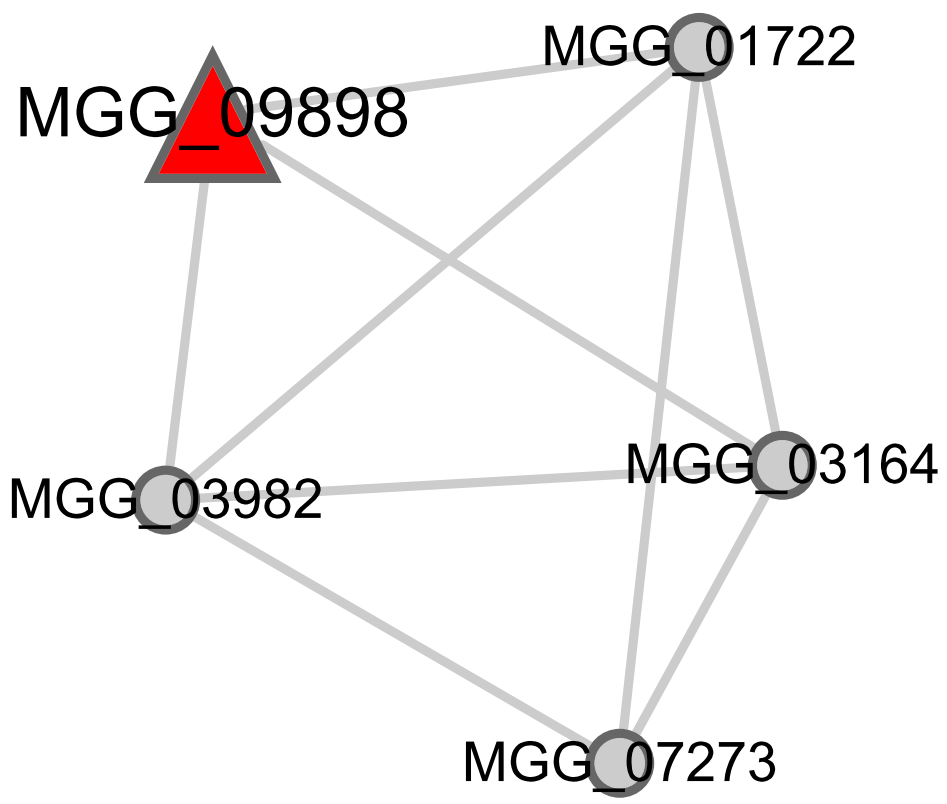

Chromatin silencing  
 $7.82 \times 10^{-3}$

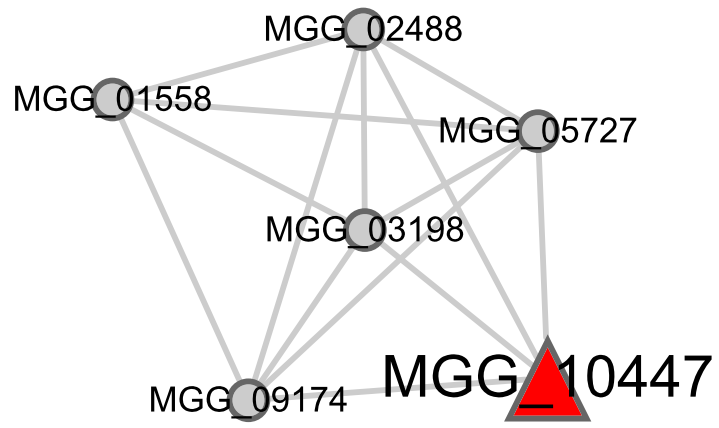

Supplement: 1471-2164-9-519-S3.pdf [file 1471-2164-9-519-S3.pdf]
