# Supplementary material for: The prediction of protein-protein interaction networks in rice blast fungus
Source: PubMed Central journal article supplement (PMC2601049; doi:10.1186/1471-2164-9-519), 2008-11-02

**Additional file 4. The network of pathogenicity proteins.**

This subnet consisted of the 32 pathogenicity proteins and their interaction partners. This figure can be zoomed in to view the corresponding BROAD accession number of each node. Triangle nodes indicated pathogenicity proteins, while the circular nodes denoted their interacting partners. The size of a circular node is proportional to its degree in the whole network. The golden triangle nodes represented pathogenicity genes uncovered by the high-throughput method, while the red triangle nodes stand for those collected from the PHI-base website.



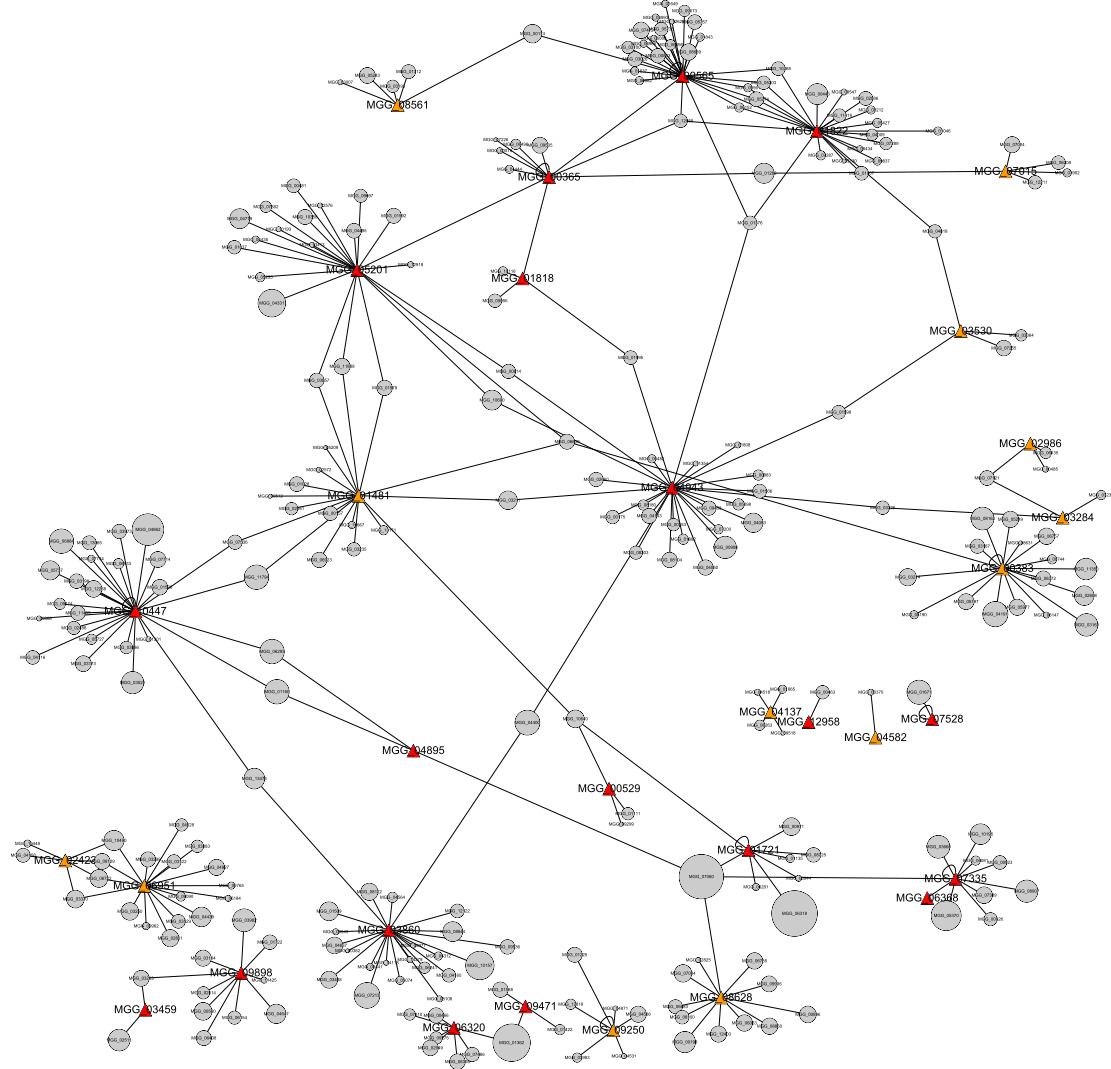

Supplement: 1471-2164-9-519-S4.pdf [file 1471-2164-9-519-S4.pdf]
